# Supplementary figures and images for: Mercury speciation with l-cysteine functionalized cellulose fibre as adsorbent by atomic fluorescence spectrometry
Source: Royal Society of Chemistry journal article supplement (doi:10.1039/c0ja00185f), 2011-01-01

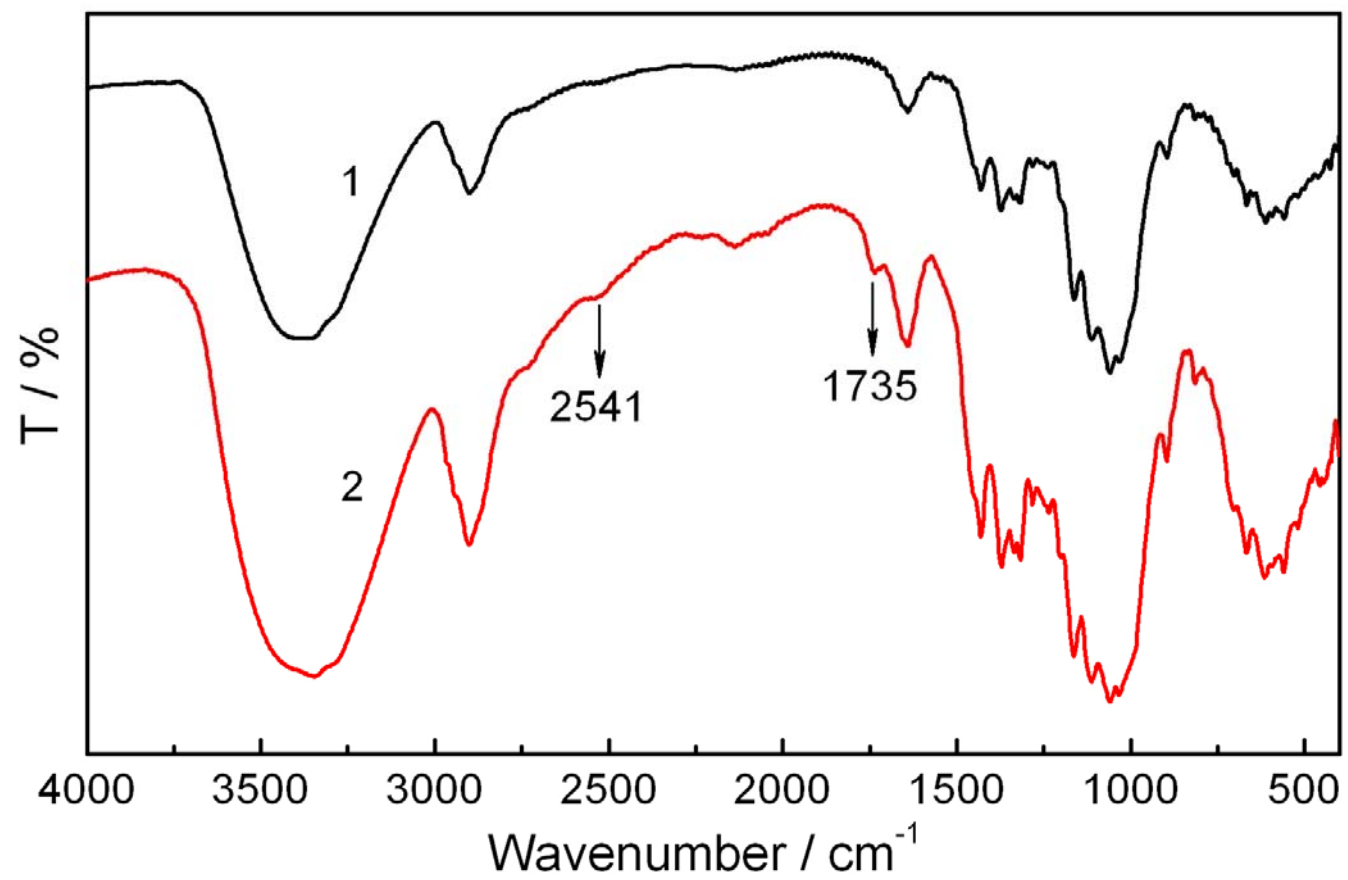

Supplement: figure s1.pdf [file figure%20s1.pdf]

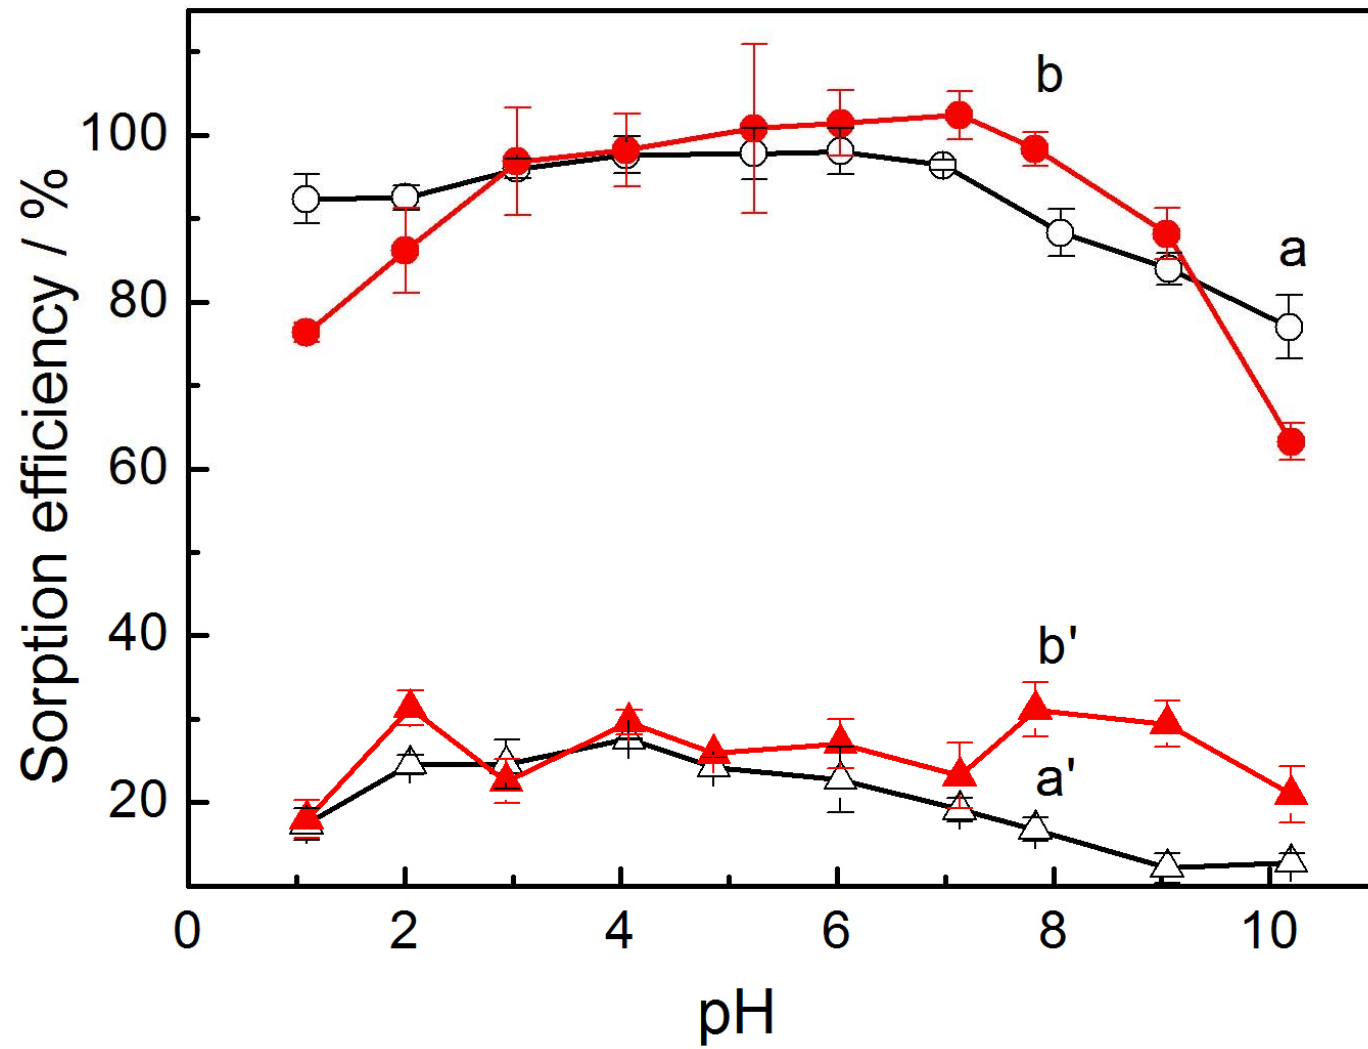

Supplement: figure s2.pdf [file figure%20s2.pdf]

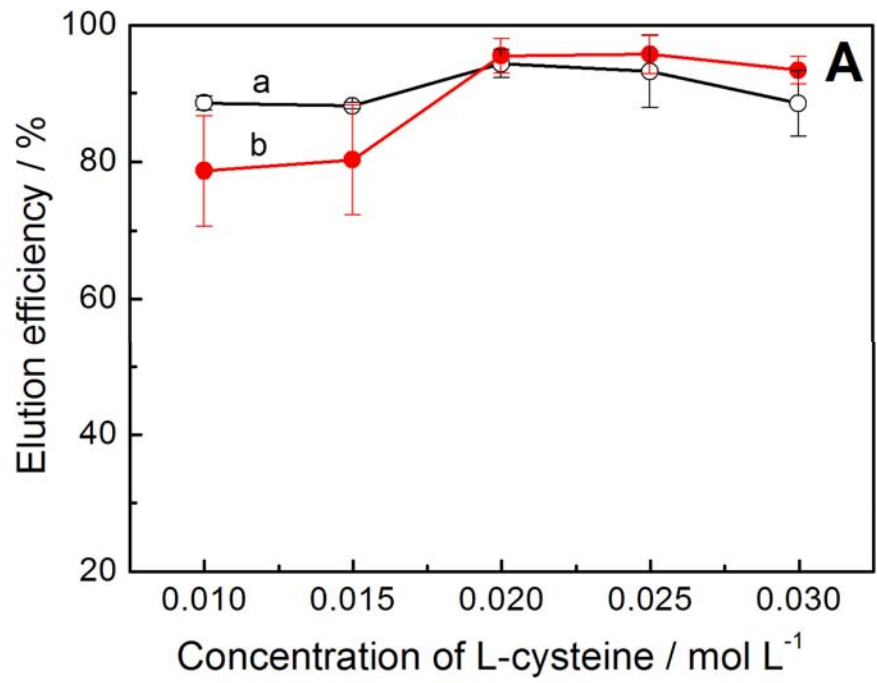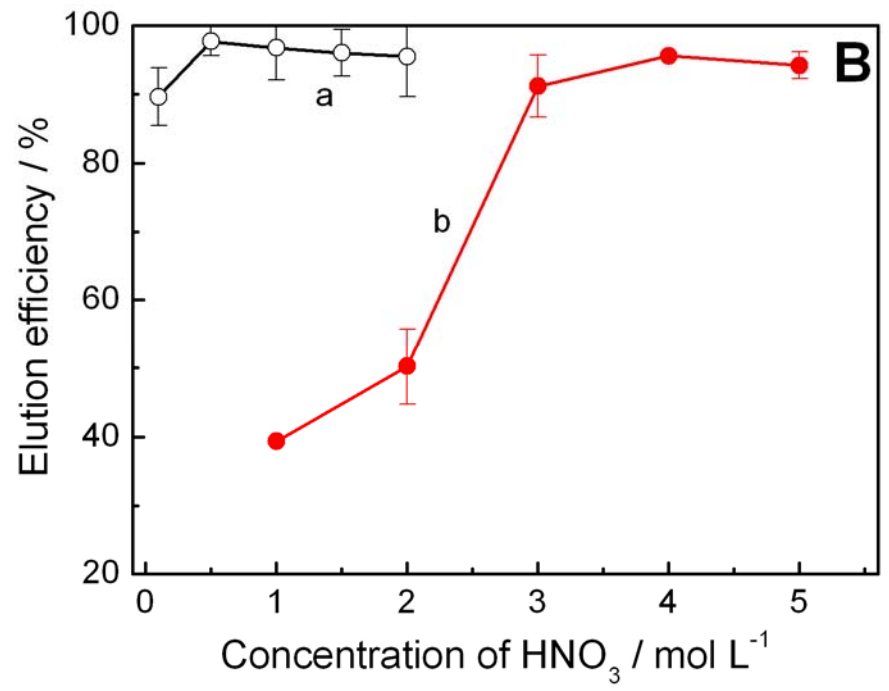

Supplement: figure s3.pdf [file figure%20s3.pdf]
